# Supplementary material
Source: PubMed Central journal article supplement (PMC10410478)
Supplement: jama-e2312618-s002.pdf [file jama-e2312618-s002.pdf]

## Data Sharing Statement

Zhao. Sugar-Sweetened and Artificially Sweetened Beverages and Risk of Liver Cancer and Chronic Liver Disease Mortality. *JAMA*. Published August 08, 2023.  
doi:10.1001/jama.2023.12618

### Data

**Data available:** No
